# Supplementary material for: Structure-based design to explore the anticancer efficacy of organometallic Pt(ii)- and Au(iii)-N-heterocyclic carbene (NHC) complexes
Source: Royal Society of Chemistry journal article supplement (doi:10.1039/d4nj02853h), 2024-01-01
Supplement: d4nj02853h1.pdf [file d4nj02853h1.pdf]

Supporting Information for

**Structure-base design to explore the anticancer efficacy of Pt(II)- and Au(III)-N-heterocyclic carbene (NHC) complexes**

Poja Das,<sup>a</sup> Sraddhya Roy,<sup>b</sup> Chaitali Das,<sup>a</sup> Raju Biswas,<sup>c</sup> Nabanita Chatterjee,<sup>b\*</sup> Joydev Dinda<sup>a\*</sup>

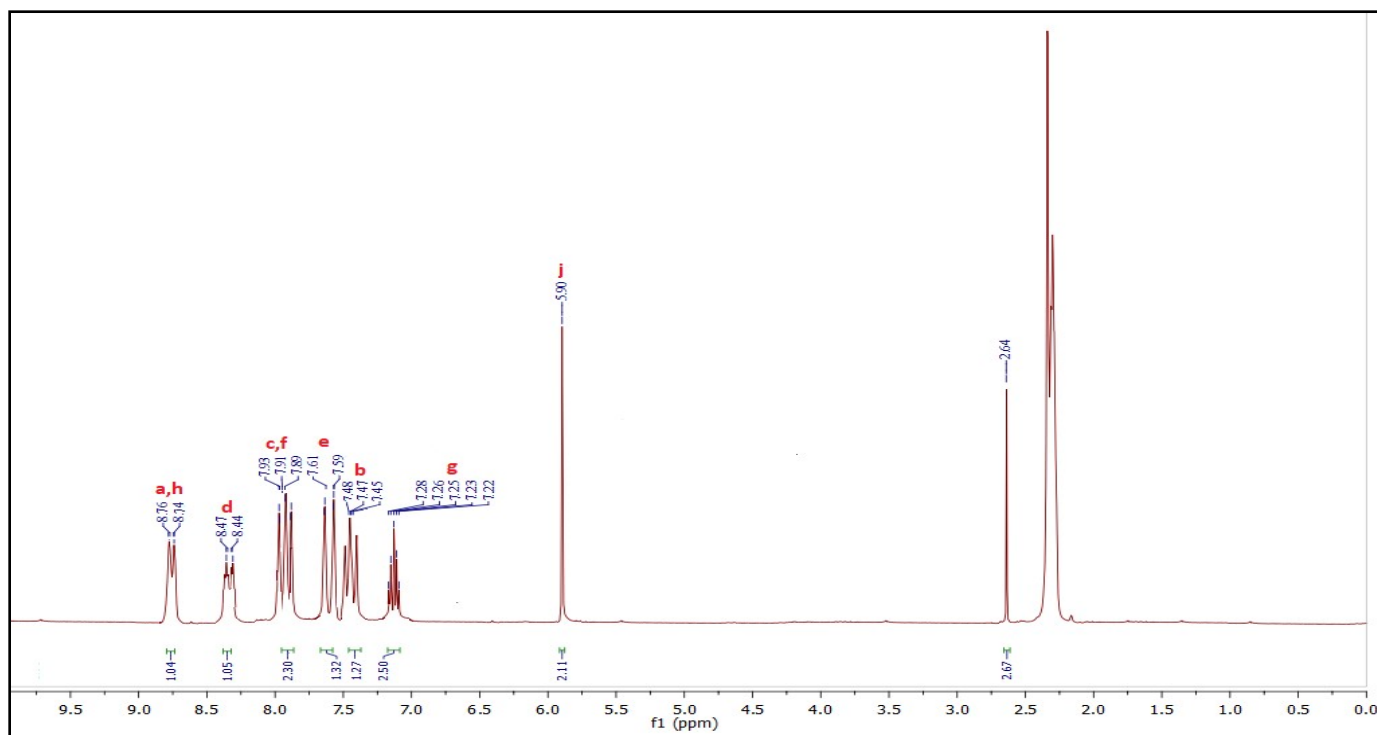

**Figure S1:** <sup>1</sup>H NMR of complex 2.

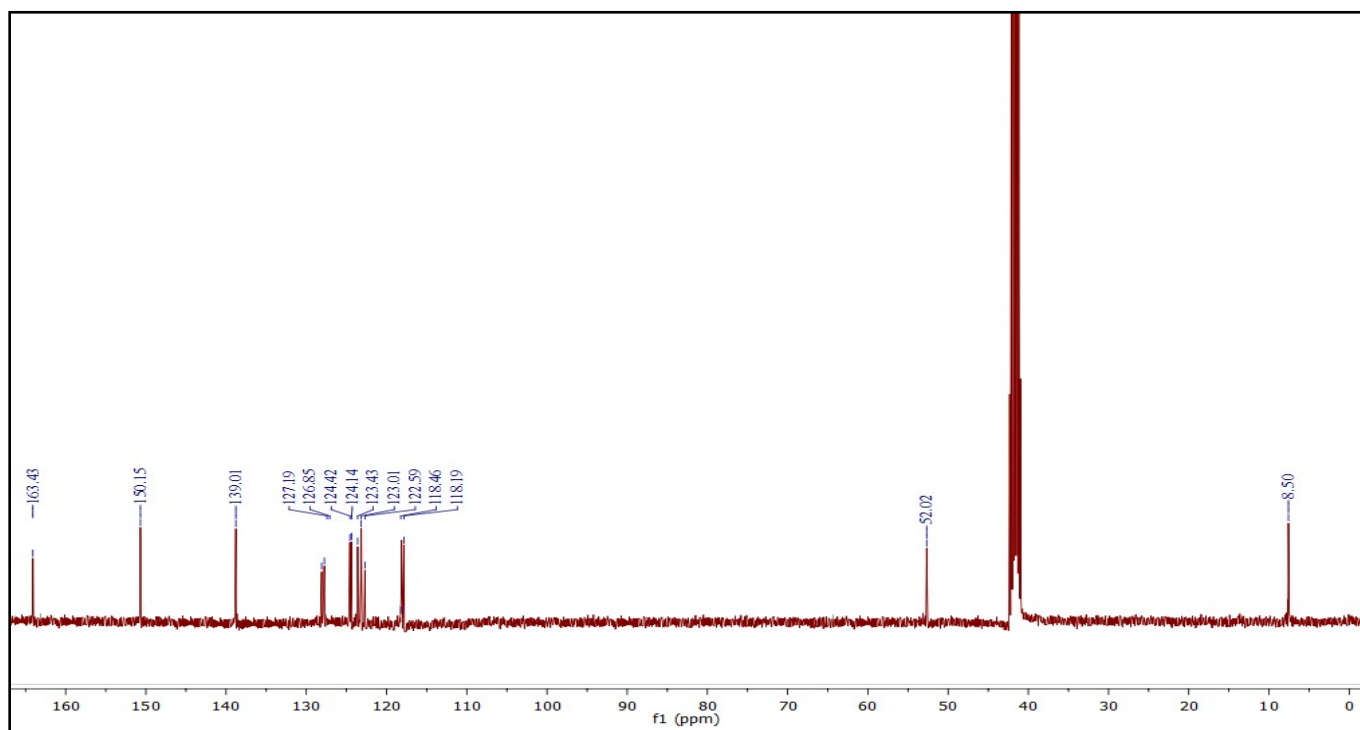

Figure S2:  $^{13}\text{C}$  NMR of complex 2.

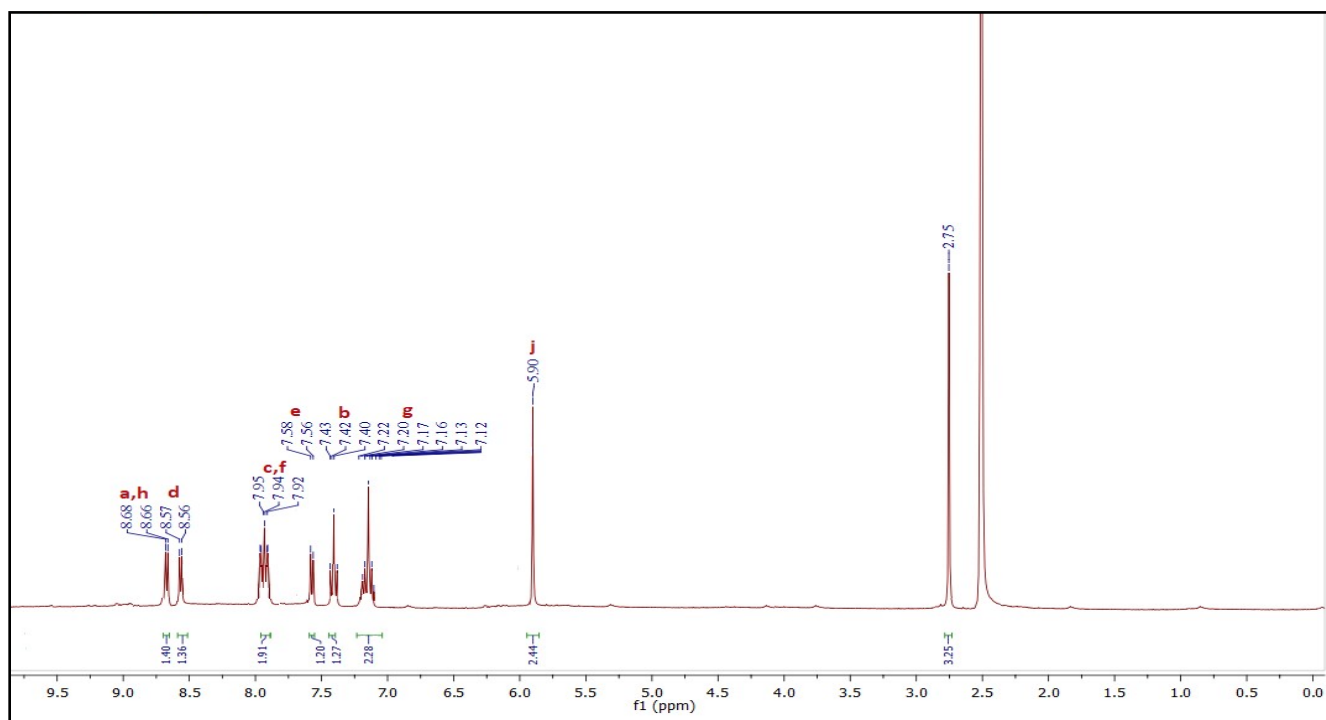

Figure S3:  $^1\text{H}$  NMR of complex 3.

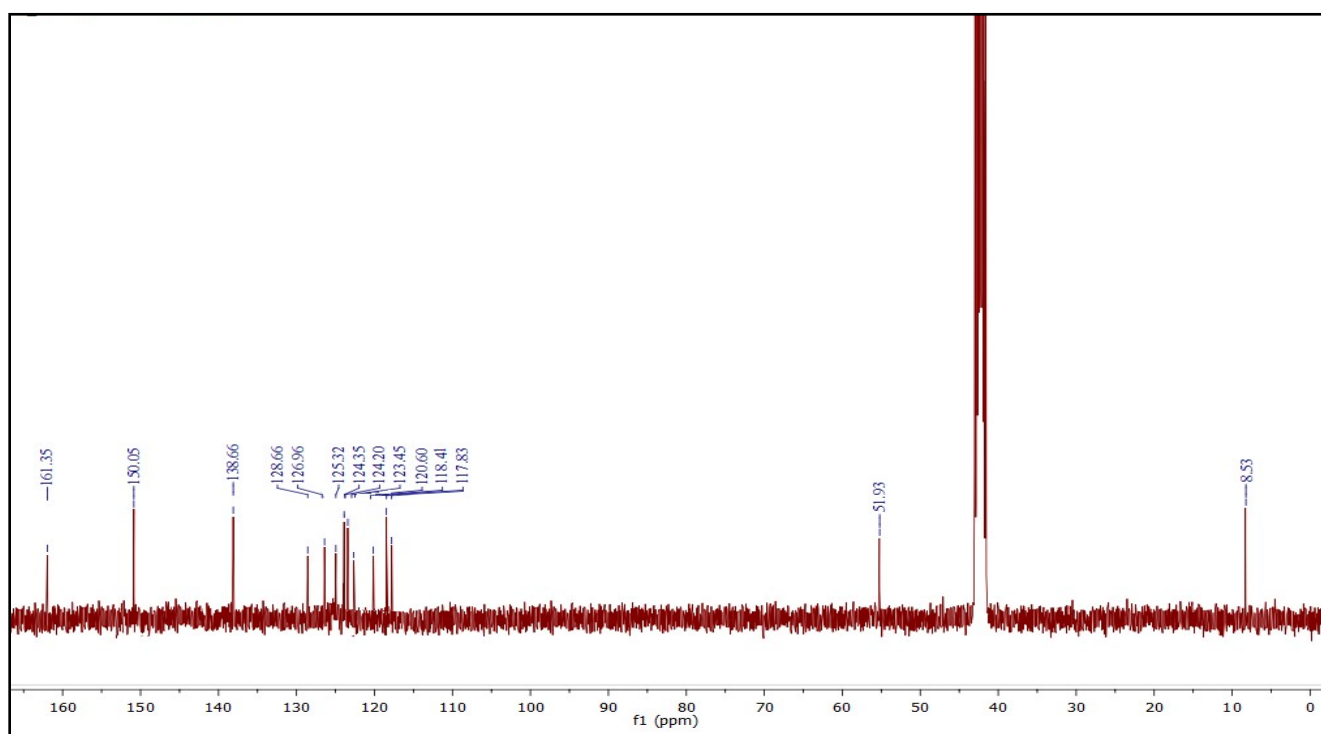

**Figure S4:**  $^{13}\text{C}$  NMR of complex 3.

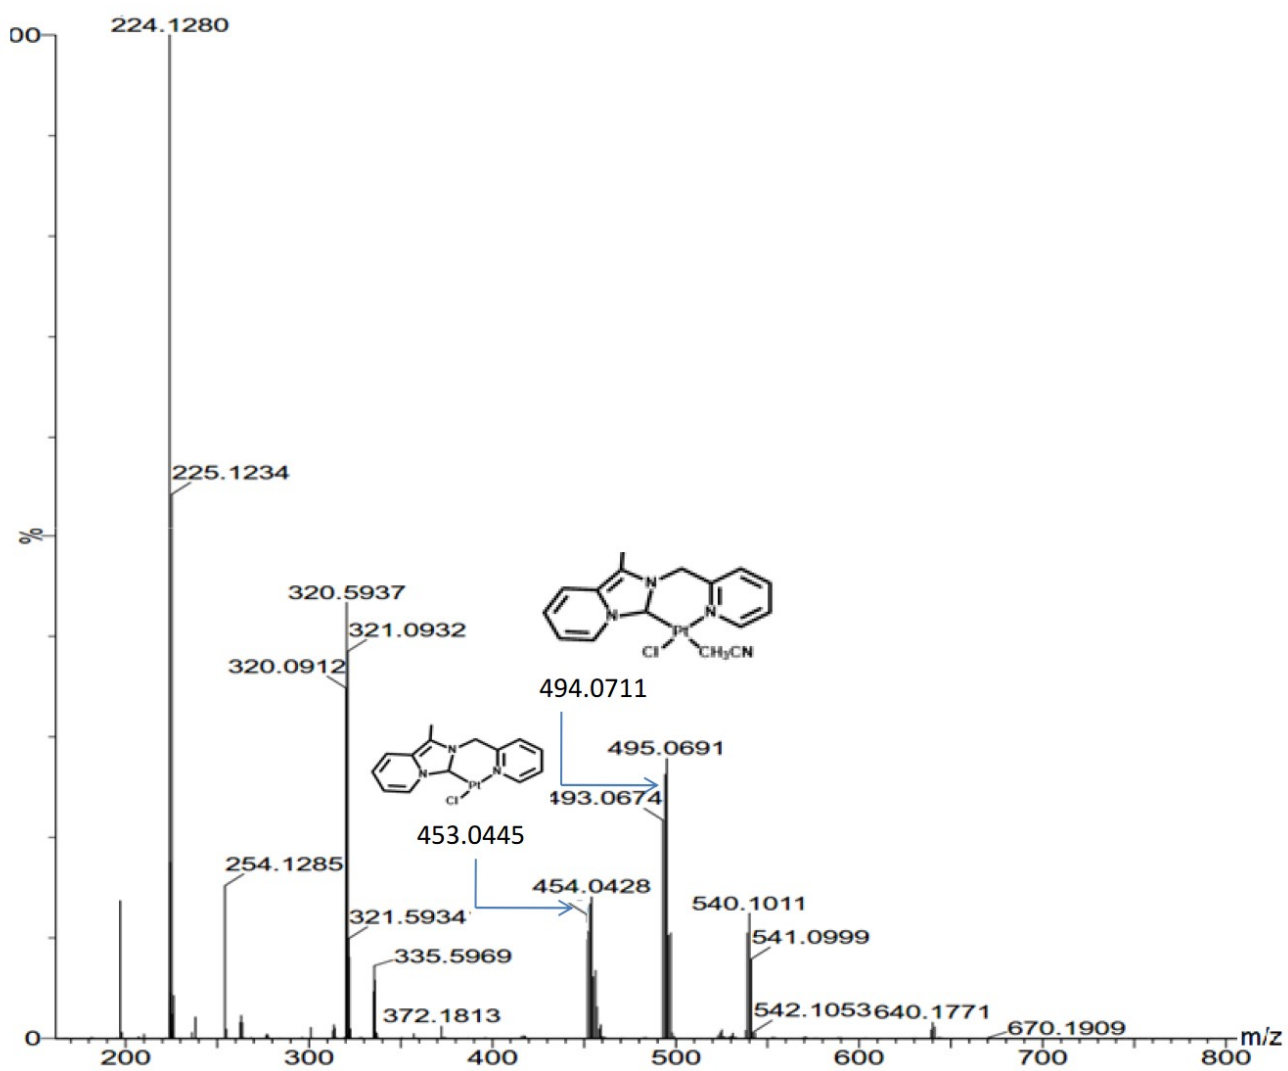

Figure S5: Mass spectra of complex 2.

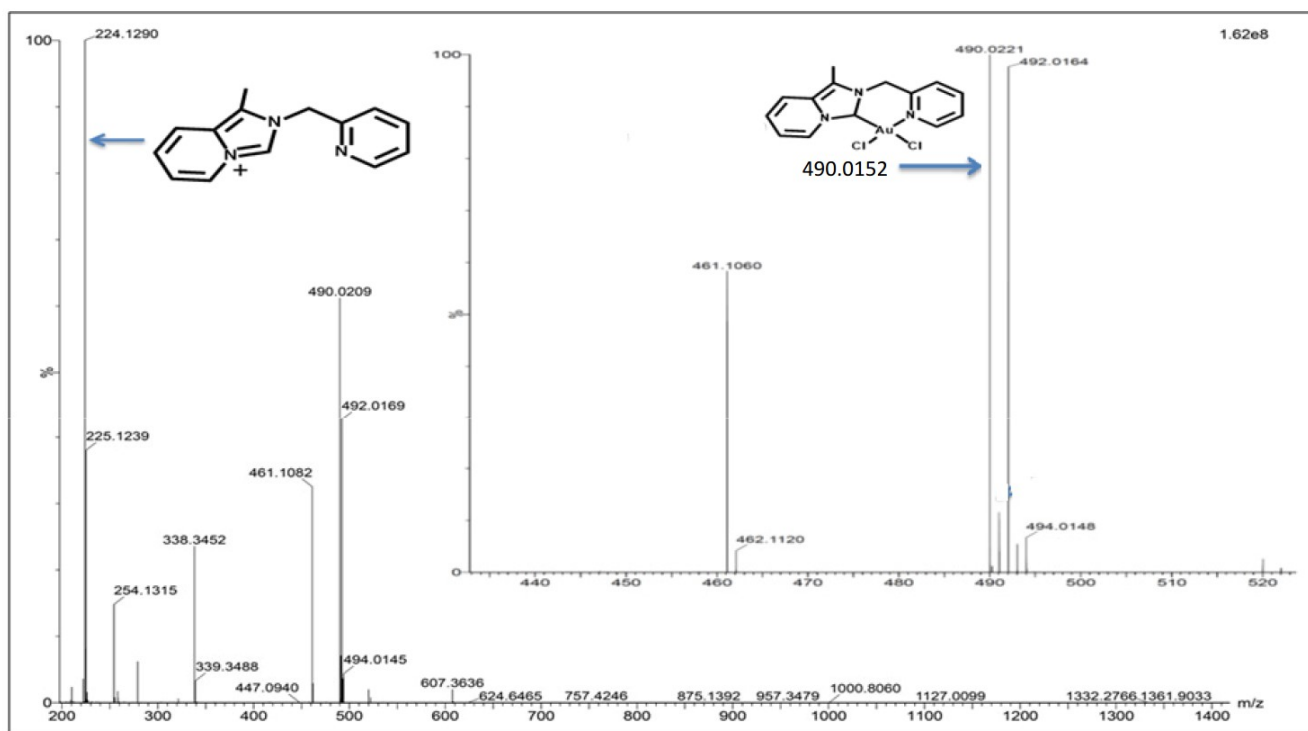

Figure S6: Mass spectra of complex 3.

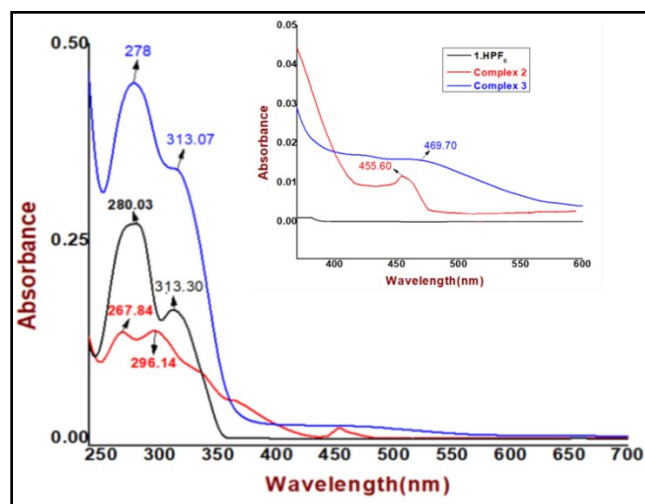

Figure S7: UV-Vis spectra of 1.HPF<sub>6</sub>, complex 2 and complex 3.

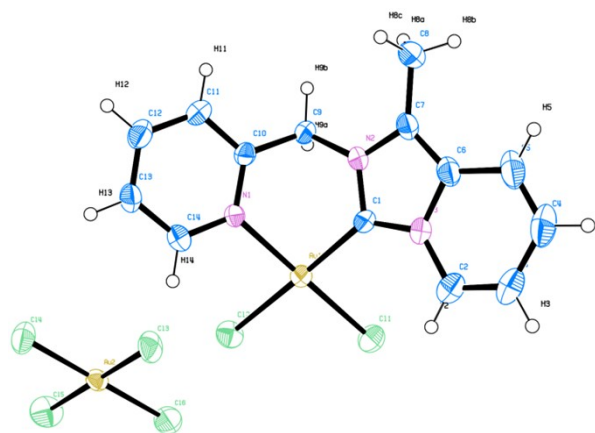

**Figure S8:** ORTEP view of complex 3.

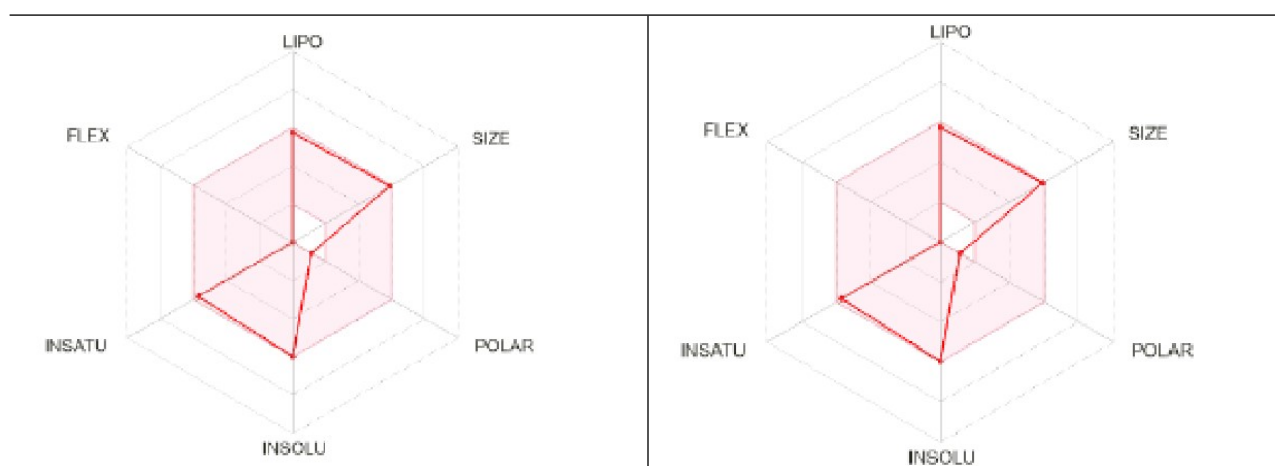

**Figure S9.** Pharmacokinetic studies of complex 2 (left) and complex 3 (right) shows the similar potency of the complexes to be used as drug.

*(Drug designing and development depends on the assessment of absorption, distribution, metabolism, and excretion (ADME); Swiss ADME is a web tool that offers robust predictive models for physicochemical properties, pharmacokinetics, drug-likeness and medicinal chemistry friendliness. Pioneer work of Lipinski that consider a compound to be used as a drug define some physicochemical parameters, so-called 'Rule-of-five' established the relationship between pharmacokinetics and physicochemical parameters. In this context, six physicochemical properties are taken into consideration: size, solubility, lipophilicity, polarity, flexibility, and saturation. Considering physicochemical range a pink area is obtained in which the radar plot of the molecule has to fall entirely to be considered drug-like. Out of six properties, all the properties remain within the pink area in the case of our present complex 2 and 3 as shown in Figure S9 that supports the similar potency.)*

**Table T1:** Summary of spectral data of 1.HPF<sub>6</sub> and complex 2 and 3.

| Complex            | $\lambda_{\text{max}}$ (nm) ( $\epsilon$ , $\text{M}^{-1} \text{cm}^{-1}$ ) |
|--------------------|-----------------------------------------------------------------------------|
| 1.HPF <sub>6</sub> | 280.03 (5485), 311.28 (3222)                                                |
| 2                  | 267.84 (2724), 296.14 (2744), 455.60 (228)                                  |
| 3                  | (9034), 313.07 (6855), 469.70 (313)                                         |

**Table T2:** Crystallographic parameters of complex **3**.

|                                                |                                                                    |
|------------------------------------------------|--------------------------------------------------------------------|
| Empirical formula                              | $\text{C}_{14}\text{H}_{13}\text{Au}_2\text{Cl}_6\text{N}_3$       |
| Formula weight                                 | 829.91                                                             |
| Temperature/K                                  | 293(2)                                                             |
| Crystal system                                 | monoclinic                                                         |
| Space group                                    | P 1 21/c 1                                                         |
| $a/\text{\AA}$                                 | 17.5971(5)                                                         |
| $b/\text{\AA}$                                 | 7.7989(2)                                                          |
| $c/\text{\AA}$                                 | 15.1023(4)                                                         |
| $\alpha/^\circ$                                | 90                                                                 |
| $\beta/^\circ$                                 | 100.6220(10)                                                       |
| $\gamma/^\circ$                                | 90                                                                 |
| Volume/ $\text{\AA}^3$                         | 2037.09(10)                                                        |
| Z                                              | 4                                                                  |
| $\rho_{\text{calc}}/\text{g/cm}^3$             | 2.706                                                              |
| $\mu/\text{mm}^{-1}$                           | 15.178                                                             |
| F(000)                                         | 1512.0                                                             |
| Crystal size/ $\text{mm}^3$                    | $0.13 \times 0.12 \times 0.11$                                     |
| Radiation                                      | MoK $\alpha$ ( $\lambda = 0.71073$ )                               |
| 2 $\Theta$ range for data collection/ $^\circ$ | 2.87 to 27.46                                                      |
| Index ranges                                   | $-22 \leq h \leq 22$ , $-10 \leq k \leq 10$ , $-19 \leq l \leq 19$ |
| Reflections collected                          | 24453                                                              |
| Independent reflections                        | 4641 [ $R_{\text{int}} = 0.0453$ , $R_{\text{sigma}} = 0.0321$ ]   |
| Data/restraints/parameters                     | 4641/0/227                                                         |
| Goodness-of-fit on $F^2$                       | 1.043                                                              |
| Final R indexes [ $I \geq 2\sigma(I)$ ]        | $R_1 = 0.0300$ , $wR_2 = 0.0630$                                   |
| Final R indexes [all data]                     | $R_1 = 0.0392$ , $wR_2 = 0.0667$                                   |
| Largest diff. peak/hole / $e \text{\AA}^{-3}$  | 1.85/-1.54                                                         |

**Table T3:** Summary of binding energy, types of interaction, amino acids involved and the receptive bond lengths involved in the interaction of complex **2** and **3** with BCL2 with human DNA topoisomerase II.

| <b>Protein-Ligand</b>                       | <b>Docking score</b> | <b>Type of interaction</b> | <b>Interacting AA chain(or nucleotide chain) name; AA(or nucleotide) name; AA(nucleotide) no.</b> | <b>Bond length (Å)</b> |
|---------------------------------------------|----------------------|----------------------------|---------------------------------------------------------------------------------------------------|------------------------|
| BCL-2-Complex <b>2</b>                      | -6.24                | Pi-Alkyl                   | A: Leu134                                                                                         | 5.48                   |
|                                             |                      |                            | A: Phe150                                                                                         | 5.37                   |
|                                             |                      |                            | A: Met112                                                                                         | 4.22                   |
|                                             |                      | Alkyl                      | A: Met112                                                                                         | 3.94                   |
|                                             |                      |                            | A: Leu134                                                                                         | 3.79                   |
|                                             |                      |                            | A: Ala146                                                                                         | 3.44                   |
|                                             |                      | Pi-Pi T-shaped             | A: Phe101                                                                                         | 5.62                   |
|                                             |                      | Pi-Anion                   | A: Glu133                                                                                         | 4.05                   |
| Carbon                                      | A: Asp108            | 3.17                       |                                                                                                   |                        |
| Human DNA Topoisomerase II-Complex <b>2</b> | -7.45                | Pi-Alkyl                   | D: DG9                                                                                            | 5.29                   |
|                                             |                      |                            | A: Ile856                                                                                         | 5.07                   |
|                                             |                      | Alkyl                      | A: Lys868                                                                                         | 3.57                   |
|                                             |                      |                            | A: Leu995                                                                                         | 4.45                   |
|                                             |                      |                            | A: Leu995                                                                                         | 4.29                   |
|                                             |                      | Pi-donor                   | C: DA8                                                                                            | 2.85                   |
|                                             |                      | Carbon                     | A: Glu854                                                                                         | 2.95                   |
|                                             |                      |                            | C: DC9                                                                                            | 2.89                   |
| BCL-2-Complex <b>3</b>                      | -6.48                | Pi-Alkyl                   | A: Met112                                                                                         | 5.04                   |
|                                             |                      |                            | A: Ala146                                                                                         | 5.00                   |
|                                             |                      |                            | A: Val130                                                                                         | 4.82                   |
|                                             |                      |                            | A: Leu134                                                                                         | 4.50                   |
|                                             |                      |                            | A: Phe101                                                                                         | 4.32                   |
|                                             |                      |                            | A: Phe150                                                                                         | 4.18                   |
|                                             |                      | Alkyl                      | A: Leu134                                                                                         | 5.23                   |
|                                             |                      |                            | A: Val130                                                                                         | 4.19                   |
|                                             |                      |                            | A: Leu134                                                                                         | 3.49                   |
|                                             |                      | Pi-Pi T-shaped             | A: Phe101                                                                                         | 4.84                   |
| Carbon                                      | A: Ala146            | 2.94                       |                                                                                                   |                        |
| Human DNA Topoisomerase II-Complex <b>3</b> | -7.27                | Pi-Alkyl                   | A: Met847                                                                                         | 5.46                   |
|                                             |                      | Alkyl                      | A: Pro716                                                                                         | 4.82                   |
|                                             |                      |                            | A: Lys723                                                                                         | 4.53                   |
|                                             |                      |                            | A: Leu771                                                                                         | 4.19                   |
|                                             |                      | Amide-Pi-stacked           | A: Leu722                                                                                         | 4.79                   |
|                                             |                      | Pi-sigma                   | A: Asn851                                                                                         | 3.79                   |
|                                             |                      | Carbon                     | A: Gly852                                                                                         | 2.92                   |
